# Supplementary material for: High-resolution directed human connectomes and the Consensus Connectome Dynamics
Source: PubMed Central journal article supplement (PMC6467387; doi:10.1371/journal.pone.0215473), 2019-04-16
Supplement: pone.0215473.s001.pdf [file pone.0215473.s001.pdf]

Supporting material for the article: B Szalkai, C Kerepesi, B Varga, V Grolmusz:  
High-Resolution Directed  
Human Connectomes and the Consensus Connectome Dynamics

The source code of the program computing the direction of the connectome edges:

```
using Satsuma;
using Satsuma.IO.GraphML;
using System;
using System.Collections.Generic;
using System.IO;
using System.Linq;
using System.Text;
using System.Threading.Tasks;
using System.Diagnostics;

namespace BalazsDirection
{
    class Utils
    {
        public static void Swap<T>(ref T x, ref T y)
        {
            T tmp = x;
            x = y;
            y = tmp;
        }
    }

    class Program
    {
        // can be 1 or 2
        const int algorithmVersion = 1;
        static readonly string versionStr = (algorithmVersion == 1 ? "" :
        "+" + algorithmVersion);
        const bool doNotDirectInnerEdges = (algorithmVersion == 2);

        static int LogicalOr(int a, int b)
        {
            if (a != 0)
                return a;
            return b;
        }

        class ArcData
        {
            public string Name; // node1~node2, where node1 precedes node2
            lexicographically
            public List<int> Directions;

            public int Direction; // -1: undef, 0: forward, 1: backward
            public int ContainingDivisions() { return Directions.Count; } // number
            of divisions containing
            this edge
            public int MajoritySize; // number of divisions with majority verdict
        }

        Dictionary<string, ArcData> arcData = new Dictionary<string, ArcData>();
        Dictionary<string, string> rowForEdge = new Dictionary<string, string>();
        Dictionary<string, double[]> nodePosByName = new Dictionary<string,
        double[]>();

        // start: index of start graphml in list
        // end: index of end graphml in list
        void Process(List<string> graphmls, int start, int end)
        {
            string nodesCsv = "graph_nodes" + versionStr + "_" + start + "_" + end
            + ".csv";
            string arcsCsv = "graph_arcs" + versionStr + "_" + start + "_" + end +

```

```

".csv";
    string arcFreqFileName = "arcfreq" + versionStr + "_" + start + "_" +
end + ".csv";
    string outGraphml = "directed_graph" + versionStr + "_" + start + "_" +
end + ".graphml";
    if (File.Exists(nodesCsv) && File.Exists(arcsCsv))
    {
        // load edge direction data
        foreach (var line in File.ReadLines(arcsCsv))
        {
            int semicolon = line.IndexOf(';');
            if (semicolon < 0)
                continue;
            string edgeName = line.Substring(0, semicolon);
            string row = line.Substring(semicolon+1);
            if (!rowForEdge.ContainsKey(edgeName))
                rowForEdge[edgeName] = "";
            rowForEdge[edgeName] += row;

            string[] t = line.Split(';');
            int arcDir = int.Parse(t[t.Length - 2]);

            if (!arcData.ContainsKey(edgeName))
            {
                arcData[edgeName] = new ArcData();
                arcData[edgeName].Directions = new List<int>();
            }
            arcData[edgeName].Name = edgeName;
            arcData[edgeName].Directions.Add(arcDir);
        }
        return;
    }

    // load the graphs and create the sum graph
    CustomGraph sumGraph = new CustomGraph();
    Dictionary<Node, string> nodeName = new Dictionary<Node,
string>();
    // Dictionary<Node, double[]> nodePos = new Dictionary<Node,
double[]>();
    Dictionary<string, Node> nodeByName = new Dictionary<string, Node>();
    Dictionary<Arc, int> arcFrequency = new Dictionary<Arc,
int>();

    int maxArcFrequency = 0;
    for (int i = start; i < end; ++i)
    {
        GraphMLFormat f = new GraphMLFormat();
        Console.WriteLine(graphmls[i]);
        try
        {
            f.Load(graphmls[i]);
        }
        catch
        {
            continue;
        }
        IGraph g = f.Graph;
        var pName =
(StandardProperty<string>)f.Properties.Where(p => p.Name ==
"dn_name").First();
        var px = (StandardProperty<double>)f.Properties.Where(p => p.Name
== "dn_position_x").First
();
        var py = (StandardProperty<double>)f.Properties.Where(p => p.Name
== "dn_position_y").First
();
        var pz = (StandardProperty<double>)f.Properties.Where(p => p.Name
== "dn_position_z").First
();

        if (sumGraph.NodeCount() == 0)
            foreach (var n in g.Nodes())
            {
                Node n2 = sumGraph.AddNode();

```

```

        nodeName[n2] = pNode[n];
        nodeByName[nodeName[n2]] = n2;
        nodePosByName[nodeName[n2]] = new double[] { px[n], py[n],
pz[n] };
    }

    foreach (var a in g.Arcs())
    {
        Node u = g.U(a);
        Node v = g.V(a);
        Node u2 = nodeByName[pName[u]];
        Node v2 = nodeByName[pName[v]];
        Arc aInSumGraph = sumGraph.Arcs(u2,
v2).FirstOrDefault();

        if (aInSumGraph == Arc.Invalid)
        {
            aInSumGraph = sumGraph.AddArc(u2,
v2, Directedness.Undirected);

            arcFrequency[aInSumGraph] = 0;
        }
        arcFrequency[aInSumGraph]++;
        if (arcFrequency[aInSumGraph] > maxArcFrequency)
            maxArcFrequency = arcFrequency[aInSumGraph];
    }
}

using (StreamWriter sw = new StreamWriter(arcFreqFileName))
{
    foreach (var kv in arcFrequency)
    {
        var arc = kv.Key;
        string uName = nodeName[sumGraph.U(arc)];
        string vName = nodeName[sumGraph.V(arc)];
        if (uName.CompareTo(vName) > 0)
            Utils.Swap(ref uName, ref vName);
        var arcName = uName + "~" + vName;
        sw.WriteLine(arcName + ";" + kv.Value);
    }
}

// determine the step when a point became connected
Dictionary<Node,int> nodeLevel = new
Dictionary<Node,int>();
int maxLevel = 0;
foreach (var n in sumGraph.Nodes())
{
    nodeLevel[n] = sumGraph.Arcs(n).Select(a =>
arcFrequency[a]).MaxOr(0);
    maxLevel = Math.Max(maxLevel, nodeLevel[n]);
}
Dictionary<Node, int> nodeDist = new Dictionary<Node,
int>(); // distance from next
level
Subgraph eddigilek = new Subgraph(sumGraph);
eddigilek.EnableAllNodes(true);
foreach (var n in sumGraph.Nodes())
{
    foreach (var a in sumGraph.Arcs())
        eddigilek.Enable(a, arcFrequency[a] >= nodeLevel[n]);
    Bfs bfs = new Bfs(eddigilek);
    bfs.AddSource(n);
    Node parent = bfs.RunUntilReached(x => nodeLevel[x]
> nodeLevel[n]);

    if (parent == Node.Invalid)
        nodeDist[n] = int.MaxValue;
    else
        nodeDist[n] = bfs.GetLevel(parent);
}
List<Node> nodes = sumGraph.Nodes().ToList();
nodes.Sort((a, b) => LogicalOr(nodeLevel[b]-nodeLevel[a],
nodeDist[a]-nodeDist[b]));
using (StreamWriter sw = new StreamWriter(nodesCsv))
{
    foreach (var n in nodes)
    {

```

```

sw.WriteLine(nodeName[n] + ";" +
nodeLevel[n] + ";" + nodeDist[n]);
    }
}
// direct the edges
CustomGraph irányítás = new CustomGraph();
Dictionary<Node, Node> irányítottCsúcs = new Dictionary<Node, Node>();
foreach (var n in sumGraph.Nodes())
    irányítottCsúcs[n] = irányítás.AddNode();

HashSet<Arc> mustBeUndirected = new HashSet<Arc>();
if (doNotDirectInnerEdges)
{
    // don't direct those edges which were created between two points
    // already in the same component

    // first, order the edges by frequency increasing
    // (we will use them by freq decreasing actually)
    List<Arc> arcsByFreq = sumGraph.Arcs().ToList();
    arcsByFreq.SortBy(a => arcFrequency[a]);
    DisjointSet<Node> connectedComponents = new DisjointSet<Node>();
    int endOfArcRange = arcsByFreq.Count;
    for (int freq = maxArcFrequency; freq >= 1; --freq)
    {
        int startOfArcRange = endOfArcRange;
        while (startOfArcRange > 0 &&
arcFrequency[arcsByFreq[startOfArcRange - 1]] >= freq)
            --startOfArcRange;
        for (int i = startOfArcRange; i < endOfArcRange; ++i)
        {
            Arc a = arcsByFreq[i];
            Node u = sumGraph.U(a);
            Node v = sumGraph.V(a);
            if (connectedComponents.WhereIs(u) ==
connectedComponents.WhereIs(v))
                // arc appears within an already connected component
                mustBeUndirected.Add(a);
        }
        for (int i = startOfArcRange; i < endOfArcRange; ++i)
        {
            Arc a = arcsByFreq[i];
            Node u = sumGraph.U(a);
            Node v = sumGraph.V(a);
            connectedComponents.Union(connectedComponents.WhereIs(u),
connectedComponents.WhereIs(v));
        }
        endOfArcRange = startOfArcRange;
    }
    Console.WriteLine(mustBeUndirected.Count + " arcs will become
undirected by the new
method");
}

using (StreamWriter sw = new StreamWriter(arcsCsv))
{
    foreach (var a in sumGraph.Arcs())
    {
        Node u = sumGraph.U(a);
        Node v = sumGraph.V(a);
        if (nodeName[u].CompareTo(nodeName[v]) > 0)
            Utils.Swap(ref u, ref v);

        Node arcTo = Node.Invalid;
        Node arcFrom = Node.Invalid;
        int arcDir = -1; // undirected
        if (!mustBeUndirected.Contains(a))
        {
            int compareResult = LogicalOr(nodeLevel[v] - nodeLevel[u],
nodeDist[u] - nodeDist
[v]);

            if (compareResult < 0)
            {

```

```

        arcFrom = v;
        arcTo = u;
        arcDir = 1;
    }
    else if (compareResult > 0)
    {
        arcFrom = u;
        arcTo = v;
        arcDir = 0;
    }
}

Debug.Assert((arcTo == Node.Invalid) == (arcDir == -1));
if (arcTo == Node.Invalid)
    irányítás.AddArc(irányítottCsúcs[u], irányítottCsúcs[v],
Directedness.Undirected);
else
    irányítás.AddArc(irányítottCsúcs[arcFrom],
irányítottCsúcs[arcTo],
Directedness.Directed);

    string edgeName = nodeName[u] + "~" + nodeName[v];
    string row = start+";"+end+";"+nodeName[u]
+ ";" + nodeName[v] + ";" +
arcFrequency[a] + ";" + arcDir + ";";

    if (!rowForEdge.ContainsKey(edgeName))
        rowForEdge[edgeName] = "";
    rowForEdge[edgeName] += row;
    sw.WriteLine(edgeName + ";" + row);

    if (!arcData.ContainsKey(edgeName))
    {
        arcData[edgeName] = new ArcData();
        arcData[edgeName].Directions = new List<int>();
    }
    arcData[edgeName].Name = edgeName;
    arcData[edgeName].Directions.Add(arcDir);
}
}

// output the directed graph as a graphml
GraphMLFormat graphmlOut = new GraphMLFormat();
graphmlOut.Graph = irányítás;
var irányított_nodeName = new StandardProperty<string>();
irányított_nodeName.Domain = PropertyDomain.Node;
irányított_nodeName.Name = "dn_name";
foreach (Node n in nodeName.Keys)
    irányított_nodeName.Values[irányítottCsúcs[n]] = nodeName[n];
graphmlOut.Properties.Add(irányított_nodeName);
for (int i = 0; i < 3; ++i)
{
    var irányított_nodePos = new StandardProperty<double>();
    irányított_nodePos.Domain = PropertyDomain.Node;
    irányított_nodePos.Name = "dn_position_" + "xyz"[i];
    foreach (string nn in nodePosByName.Keys)
        irányított_nodePos.Values[irányítottCsúcs[nodeByName[nn]]] =
nodePosByName[nn][i];
    graphmlOut.Properties.Add(irányított_nodePos);
}
graphmlOut.Save(outGraphml);
}

int GetVerdict(int undefCount, int forwardCount, int backwardCount)
{
    int totalCount = undefCount + forwardCount + backwardCount;
    int verdict = -1;
    if (forwardCount >= 2 && totalCount - forwardCount <= 1)
        verdict = 0;
    else if (backwardCount >= 2 && totalCount - backwardCount <= 1)
        verdict = 1;
    return verdict;
}
}

```

```

static void CreateDirectedVersion(string fngraphml,
Dictionary<string,ArcData> arcData)
{
    string fnout = fngraphml.ReplaceAtEnd(".graphml", "_directed.graphml");
    if (File.Exists(fnout))
    {
        Console.WriteLine(fnout + " already exists");
        return;
    }
    Console.WriteLine("Directed version of " + fngraphml);
    GraphMLFormat f = new GraphMLFormat();
    try
    {
        f.Load(fngraphml);
    }
    catch (Exception e)
    {
        Console.WriteLine("Could not load!");
        Console.WriteLine(e);
        return;
    }
    CustomGraph g = (CustomGraph)f.Graph;

    var pName = (StandardProperty<string>)f.Properties.Where(p => p.Name ==
"dn_name").First();
    var number_of_fibers = f.Properties.Where(p => p.Name ==
"number_of_fibers").First() as
StandardProperty<int>;
    var FA_mean = f.Properties.Where(p => p.Name == "FA_mean").First() as
StandardProperty<double>;
    var FA_std = f.Properties.Where(p => p.Name == "FA_std").First() as
StandardProperty<double>;
    var fiber_length_mean = f.Properties.Where(p => p.Name ==
"fiber_length_mean").First() as
StandardProperty<double>;
    var fiber_length_std = f.Properties.Where(p => p.Name ==
"fiber_length_std").First() as
StandardProperty<double>;

    var edge_MajoritySize = new StandardProperty<int>();
    edge_MajoritySize.Domain = PropertyDomain.Arc;
    edge_MajoritySize.Name = "dn_majority_size";
    f.Properties.Add(edge_MajoritySize);

    var edge_NumberOfDivisions = new StandardProperty<int>();
    edge_NumberOfDivisions.Domain = PropertyDomain.Arc;
    edge_NumberOfDivisions.Name = "dn_prevalence";
    f.Properties.Add(edge_NumberOfDivisions);

    List<Arc> arcs = g.Arcs().ToList();
    foreach (var a in arcs)
    {
        Node u = g.U(a);
        Node v = g.V(a);
        string uname = pName.Values[u];
        string vname = pName.Values[v];
        if (uname.CompareTo(vname) > 0)
        {
            Utils.Swap(ref u, ref v);
            Utils.Swap(ref uname, ref vname);
        }

        string edgeName = uname + "~" + vname;
        if (!arcData.ContainsKey(edgeName))
            continue;

        ArcData ad = arcData[edgeName];

        // redirect the arc
        Arc theArc = a;
        switch (ad.Direction)

```

```

        {
            case 0:
                g.DeleteArc(a);
                theArc = g.AddArc(u, v, Directedness.Directed);
                break;

            case 1:
                g.DeleteArc(a);
                theArc = g.AddArc(v, u, Directedness.Directed);
                break;
        }

        edge_MajoritySize.Values[theArc] = ad.MajoritySize;
        edge_NumberOfDivisions.Values[theArc] = ad.ContainingDivisions();

        number_of_fibers.Values[theArc] = number_of_fibers.Values[a];
        FA_mean.Values[theArc] = FA_mean.Values[a];
        FA_std.Values[theArc] = FA_std.Values[a];
        fiber_length_mean.Values[theArc] = fiber_length_mean.Values[a];
        fiber_length_std.Values[theArc] = fiber_length_std.Values[a];
    }

    f.Save(fnout);
}

void Run()
{
    Console.WriteLine("Algorithm version: " + algorithmVersion);

    // graph files
    List<string> graphmls = new List<string>();
    string graphmlDir = @"graphml";
    foreach (var fn in Directory.GetFiles(graphmlDir))
    {
        if (fn.EndsWith("scale500.graphml"))
            graphmls.Add(fn);
    }
    // process in four parts
    int partCount = 4;
    for (int i = 0; i < partCount; ++i)
        Process(graphmls, graphmls.Count * i / partCount,
graphmls.Count * (i + 1) /
partCount);

    foreach (var kv in arcData)
    {
        ArcData ad = kv.Value;
        Dictionary<int, int> c = new Dictionary<int, int>();
        c[-1] = ad.Directions.Count(_ => _ == -1);
        c[0] = ad.Directions.Count(_ => _ == 0);
        c[1] = ad.Directions.Count(_ => _ == 1);
        int verdict = GetVerdict(c[-1], c[0], c[1]);
        ad.Direction = verdict;
        ad.MajoritySize = c[verdict];
    }

    foreach (var fn in graphmls)
        CreateDirectedVersion(fn, arcData);

    string outGraphml = "whole_graph"+ versionStr + ".graphml";
    string outGraphViz = "whole_graph" + versionStr + ".dot";
    CustomGraph outGraph = new CustomGraph();
    Dictionary<string, Node> nodeByName = new Dictionary<string, Node>();
    using (StreamWriter swGraph = new StreamWriter(outGraphViz))
    {
        swGraph.WriteLine("digraph directed_brain_graph {");
        using (StreamWriter sw = new
StreamWriter("all_arcs"+versionStr+".csv"))
        {
            foreach (KeyValuePair<string, string> kv in rowForEdge)
            {

```

```

string[] cells = kv.Value.Split(';');
int undefCount = 0, forwardCount = 0, backwardCount = 0;
for (int i = 0; i < partCount; ++i)
{
    int cellindex = (i + 1) * 6 - 1;
    if (cellindex >= cells.Length)
        break;
    int direction = int.Parse(cells[cellindex]);
    switch (direction)
    {
        case -1: ++undefCount; break;
        case 0: ++forwardCount; break;
        case 1: ++backwardCount; break;
    }
}
// directed edges: at least two cells in the same
direction,
// and at most 1 other cell
backwardCount);

int verdict = GetVerdict(undefCount, forwardCount,

sw.WriteLine(verdict + ";" + kv.Key + ";" + kv.Value);

string[] nodes = kv.Key.Split('~');
swGraph.WriteLine("edge[" + (verdict == -1 ? "dir = none, "
: "") + "color=red;");
if (!nodeByName.ContainsKey(nodes[0]))
    nodeByName[nodes[0]] = outGraph.AddNode();
if (!nodeByName.ContainsKey(nodes[1]))
    nodeByName[nodes[1]] = outGraph.AddNode();
switch (verdict)
{
    case -1:
        swGraph.WriteLine(nodes[0] + " -> " + nodes[1] +
";");
        outGraph.AddArc(nodeByName[nodes[0]],
nodeByName[nodes[1]],
Directedness.Undirected);
        break;
    default:
        swGraph.WriteLine(nodes[verdict] + " -> " +
nodes[1- verdict] + ";");
        outGraph.AddArc(nodeByName[nodes[verdict]],
nodeByName[nodes[1- verdict]],
Directedness.Directed);
        break;
    }
}
swGraph.WriteLine("");
}

// output the directed graph as a graphml
GraphMLFormat graphmlOut = new GraphMLFormat();
graphmlOut.Graph = outGraph;
var irányított_nodeName = new StandardProperty<string>();
irányított_nodeName.Domain = PropertyDomain.Node;
irányított_nodeName.Name = "dn_name";
foreach (var kv in nodeByName)
    irányított_nodeName.Values[kv.Value] = kv.Key;
graphmlOut.Properties.Add(irányított_nodeName);
for (int i = 0; i < 3; ++i)
{
    var irányított_nodePos = new StandardProperty<double>();
    irányított_nodePos.Domain = PropertyDomain.Node;
    irányított_nodePos.Name = "dn_position_" + "xyz"[i];
    foreach (var kv in nodePosByName)
        irányított_nodePos.Values[nodeByName[kv.Key]] = kv.Value[i];
    graphmlOut.Properties.Add(irányított_nodePos);
}
graphmlOut.Save(outGraphml);
}

```



```
static void Main(string[] args)
{
    new Program().Run();
}
}
```
